# Supplementary material
Source: PubMed Central journal article supplement (PMC4376611)

# Supplemental Figure 1

## Taf4b mRNA Testes Expression

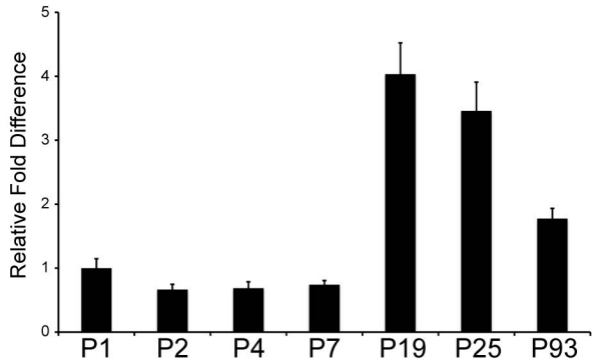

# Supplemental Figure 2

## Germ cells per tubule

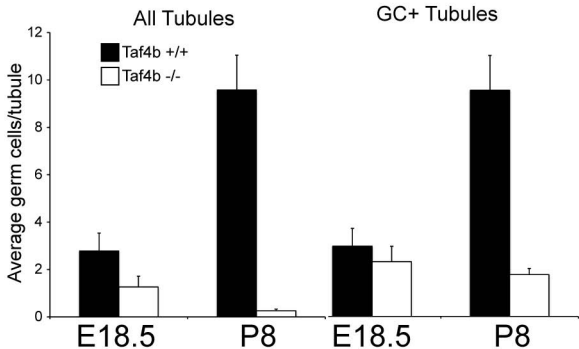

# Supplemental Figure 3

## Germ Cell Proliferation Percentage

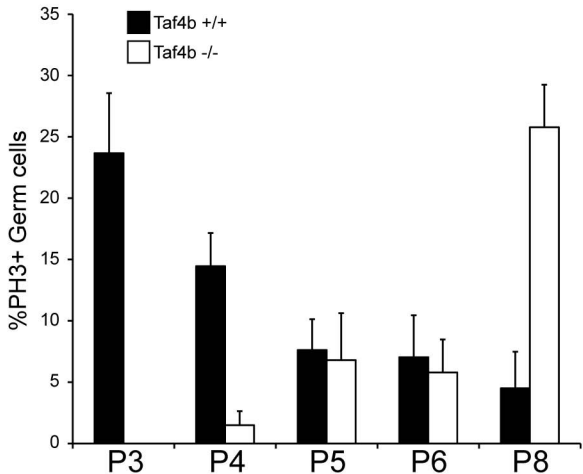

# Supplemental Figure 4

## Seminiferous Tubule Diameter

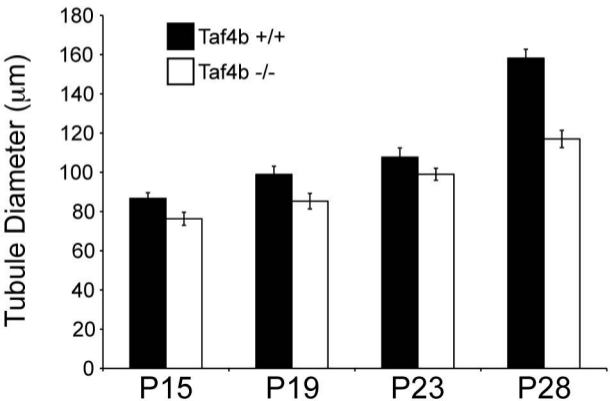

Supplement: NIHMS649673-supplement-Supp_FigureS1-S4.pdf [file NIHMS649673-supplement-Supp_FigureS1-S4.pdf]
